# Supplementary material
Source: PubMed Central journal article supplement (PMC5481499)
Supplement: NIHMS839994-supplement.pdf [file NIHMS839994-supplement.pdf]

**Title:**

Hemifield columns co-opt ocular dominance column structure in human achiasma

**Authors:**

Cheryl A. Olman<sup>1</sup>, Pinglei Bao<sup>2</sup>, Stephen A. Engel<sup>1</sup>, Andrea Grant<sup>3</sup>, Chris Purington<sup>4</sup>, Cheng Qiu<sup>5</sup>, Michael-Paul Schallmo<sup>6</sup>, Bosco S. Tjan<sup>7</sup>

**Affiliations:**

<sup>1</sup>Department of Psychology, University of Minnesota, Minneapolis, MN

<sup>2</sup>Department of Biology and Biological Engineering, California Institute of Technology, Pasadena, CA

<sup>3</sup>Department of Neuroscience, University of Minnesota, Minneapolis, MN

<sup>4</sup>University of California, Berkeley, Berkeley, CA

<sup>5</sup>Schepens Eye Research Institute, Harvard Medical School, Boston, MA

<sup>6</sup>Department of Psychology, University of Washington, Seattle, WA

<sup>7</sup>Department of Psychology, University of Southern California, Los Angeles, CA

Supplementary material:

Figure 1. Coverage and regions selected for further analysis in two control participants.

Figure 2. Single-depth and composite ocular dominance maps created for two control participants.

Figure 3. Sample time courses.

1

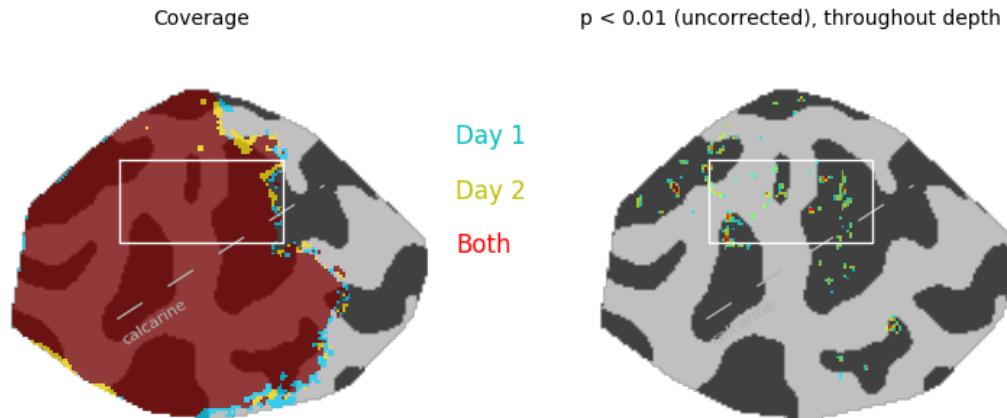

2

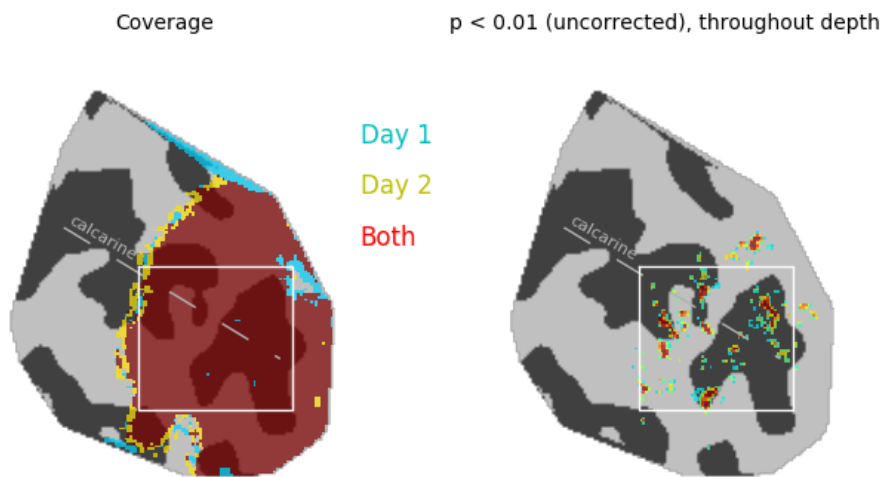

3

4 **Figure 1. Coverage and analysis regions for two control participants.** Top panels: s1000; bottom  
5 panels: s1008. The data for s1000 (top panel) were acquired with a reduction factor of 3 (R=3), instead of  
6 R=2, which was used for s1008 and the achiasmic participant. This was done to decrease distortion and  
7 aid with registration between functional and anatomical images, but the loss of contrast to noise ratio from  
8 increased sampling reduction is evident.

9

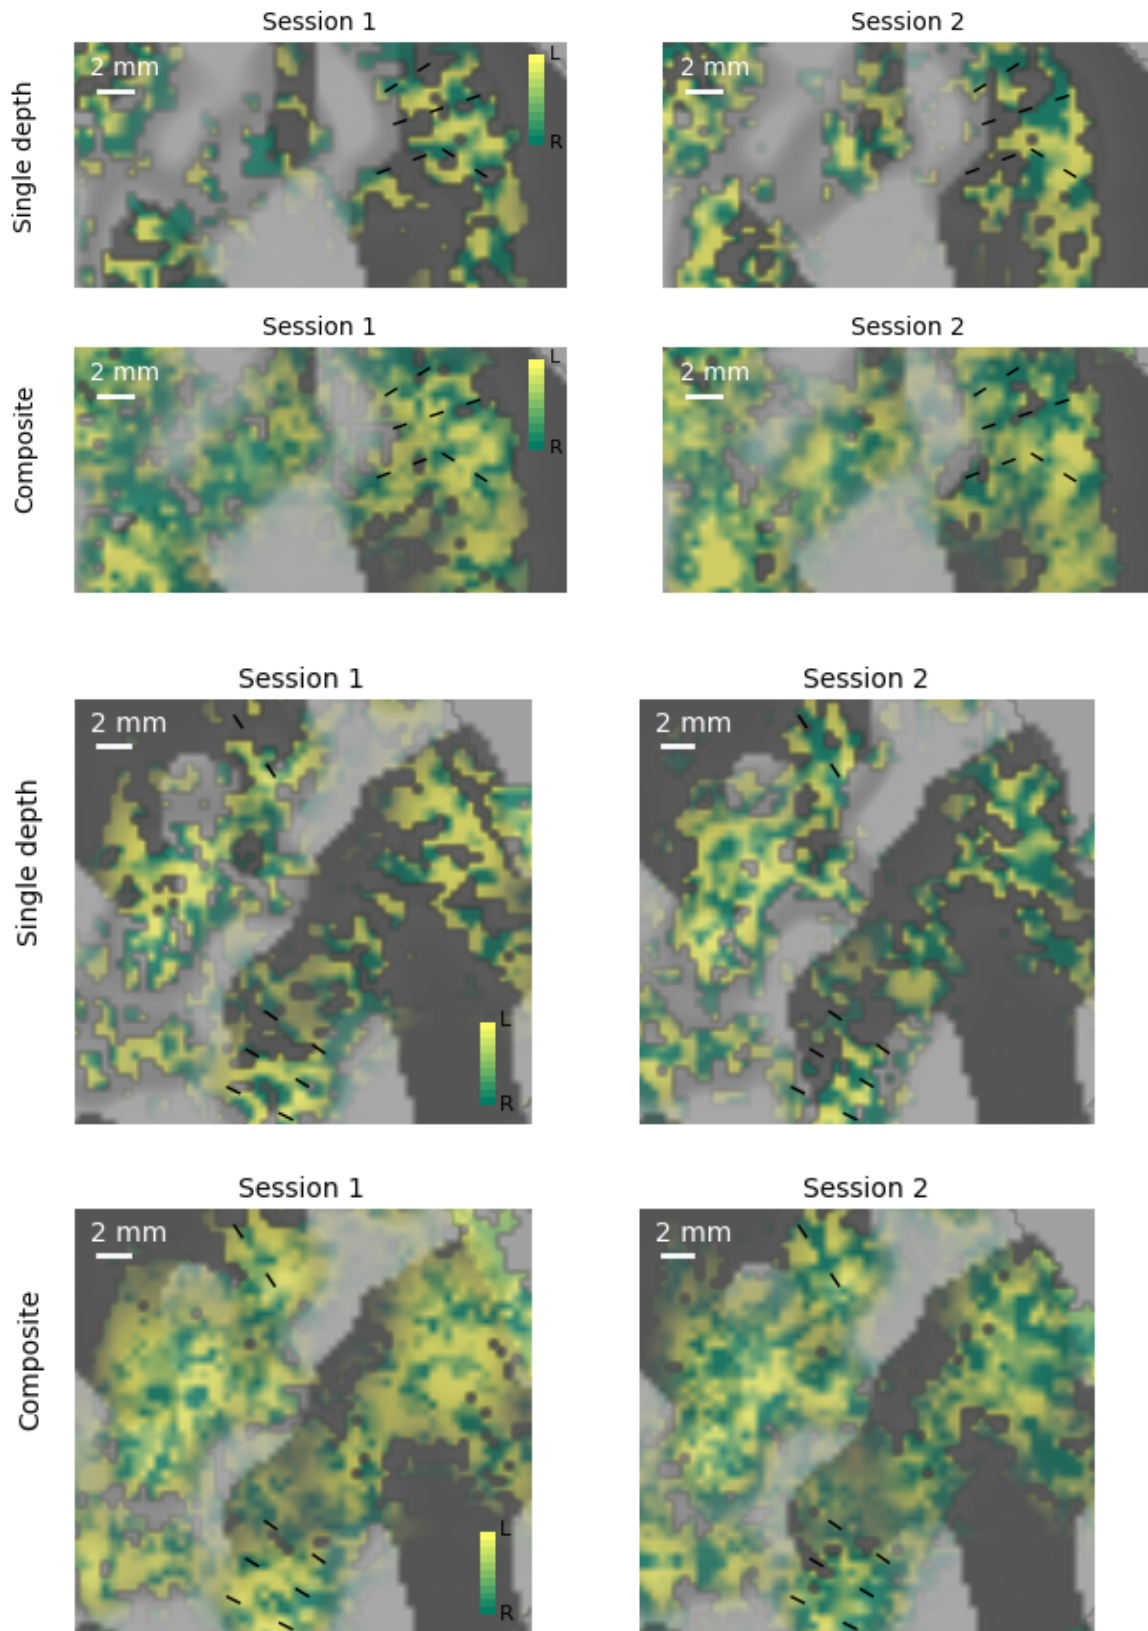

10

11

12

13

14

**Figure 2. Single-depth and composite ocular dominance maps for two control participants.** Top group of 4 panels: s1000; bottom group of 4 panels: s1008. Selectivity for left and right eye stimulation was much lower for the control participants than for the achiasmatic participant (main paper, Figure 3), resulting in

15 disappointingly weak maps of ocular dominance columns using this particular mapping approach (single  
16 condition) and resolution (0.8 mm isotropic). For each participant, black fiducial marks indicate regions  
17 where columnar organization may be visible. The separation of apparent eye-dominance stripes is  
18 comparable to the spacing visual field dominance stripes observed in the achiasmatic participant. The  
19 method used to enhance the visualization of columnar organization by combining maps across depth,  
20 using a weighting function based on relative Fourier power in the 2-3 cyc/mm band, does not enhance  
21 visualizations in these control participants. This confirms that the method of forming composite images  
22 does not create artificial columnar structures.

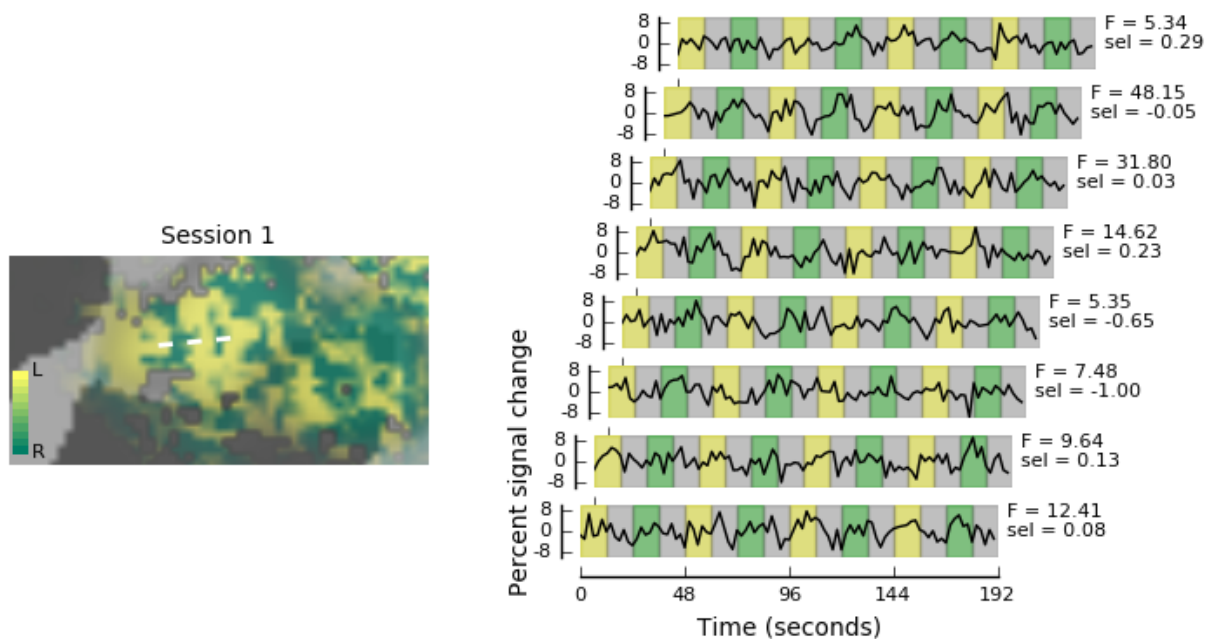

23  
24 **Figure 3. Individual voxel time courses for functional data in achiasmatic participant.** The white  
25 dashed line on the left panel indicates the region in which functional data were sampled. Traces at right are  
26 time courses for 8 functional voxels, sampled from the middle of the cortical depth in the distortion-  
27 compensated data (12 scans were averaged together, and the first 6 and last 2 rest volumes were  
28 discarded; bottom trace comes from voxel farthest to the left in left panel). No baseline detrending has  
29 been performed on these data. The strong parenchymal response is evident in the second trace from the  
30 top, with stimulus-driven modulations of several percent, even in these  $T_2$ -weighted data. The low signal-to-  
31 noise ratio of these type of data is also evident, although it is important to bear in mind that these are  
32 individual voxels at sub-millimeter resolution.
